# Supplementary material
Source: HighWire-hosted journal article supplement (http://hw-f5-jim.highwire.org/highwire/filestream/139661/field_highwire_adjunct_files/3/AFMR_Podcast_2021_69_8.pdf)

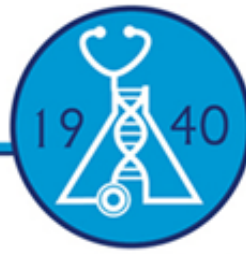

## Journal of Investigative Medicine Podcasts

[afmr.org/podcasts](http://afmr.org/podcasts)

### Breast Cancer Awareness Month

Presented Friday, October 29, 2021

by Zeina Mahleh, MD

In this episode of the JIM Podcast, Editor-In-Chief Richard McCallum speaks with Dr. Zeina Nahleh about Breast Cancer Awareness Month. Dr. Nahleh, M.D., F.A.C.P is Chair of the Department of Hematology-Oncology and Director of the Cleveland Clinic Florida Maroone Cancer Center.

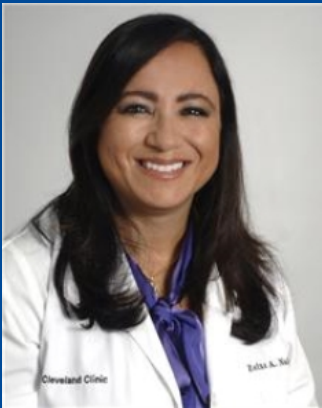

### Management of Pulmonary Arterial Hypertension

Presented Wednesday, September 1, 2021

by Himanshu Deshwal, MD

In this episode of the JIM Podcast, Editor-in-Chief Richard McCallum speaks with Dr. Himanshu Deshwal on advances in the management of pulmonary arterial hypertension. Dr. Deshwal is a fellow in Pulmonary Disease and Critical Care Medicine at the NYU Grossman School of Medicine. He received his M.B.B.S from the Armed Forces Medical College (AFMC) in Pune, India and completed his internal medicine residency with the Cleveland Clinic Foundation Program.

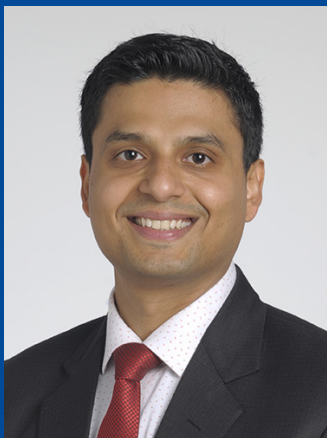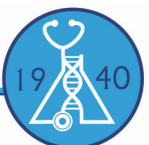

Supplement: AFMR_Podcast_2021_69_8.pdf [file AFMR_Podcast_2021_69_8.pdf]
